# Supplementary material for: Multi-cohort analysis of colorectal cancer metagenome identified altered bacteria across populations and universal bacterial markers
Source: PubMed Central journal article supplement (PMC5896039; doi:10.1186/s40168-018-0451-2), 2018-04-11
Supplement: 40168_2018_451_MOESM6_ESM.pdf [file 40168_2018_451_MOESM6_ESM.pdf]

Streptococcus sp I-G2

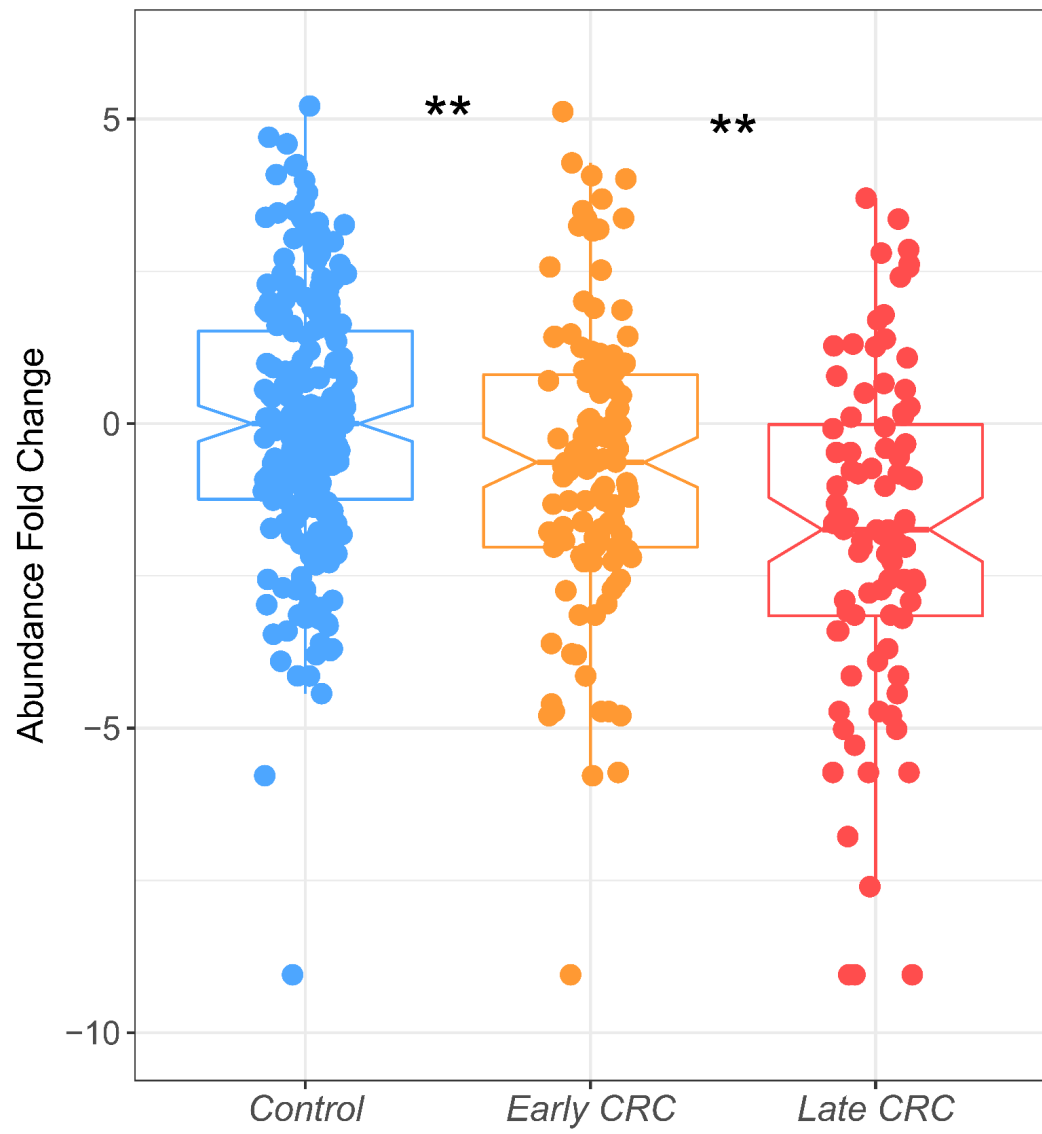

Shewanella woodyi

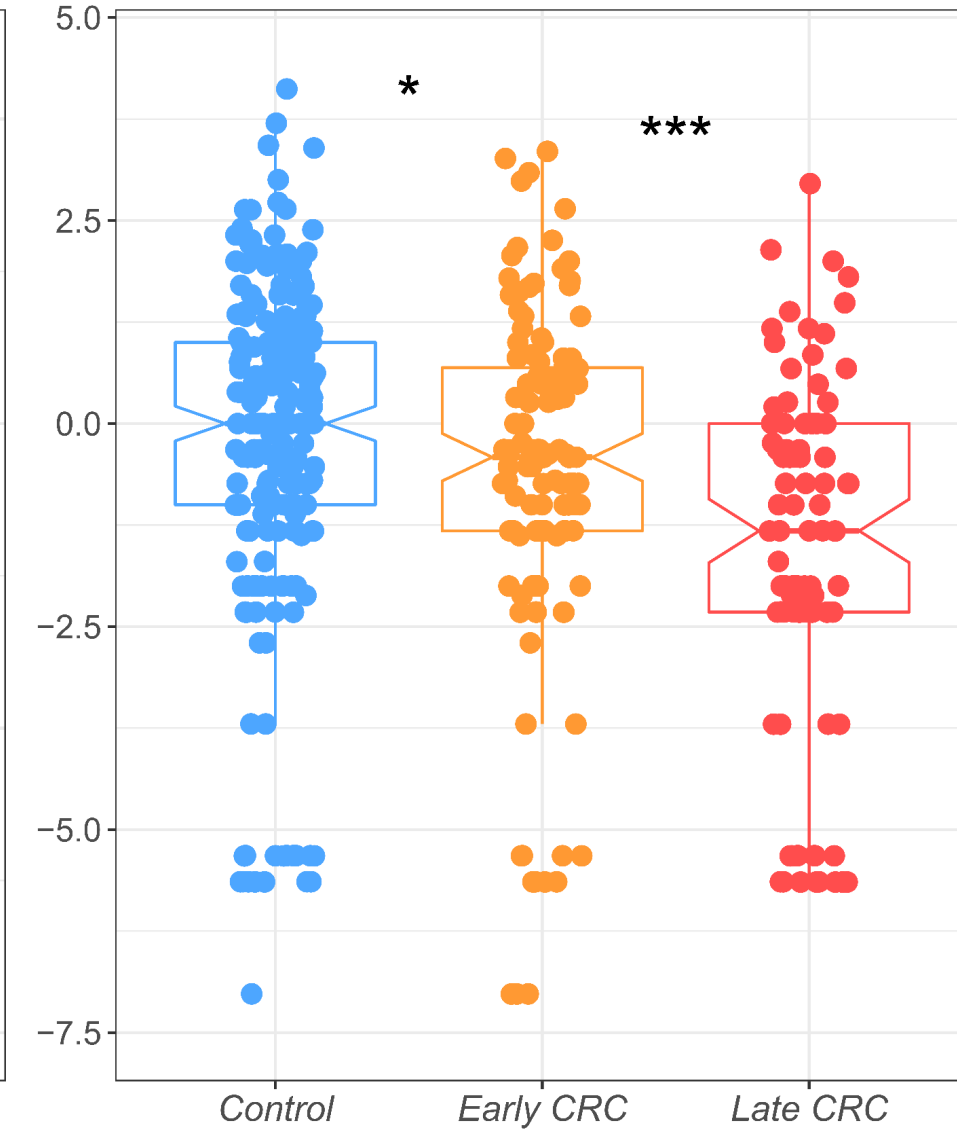

Mycoplasma penetrans

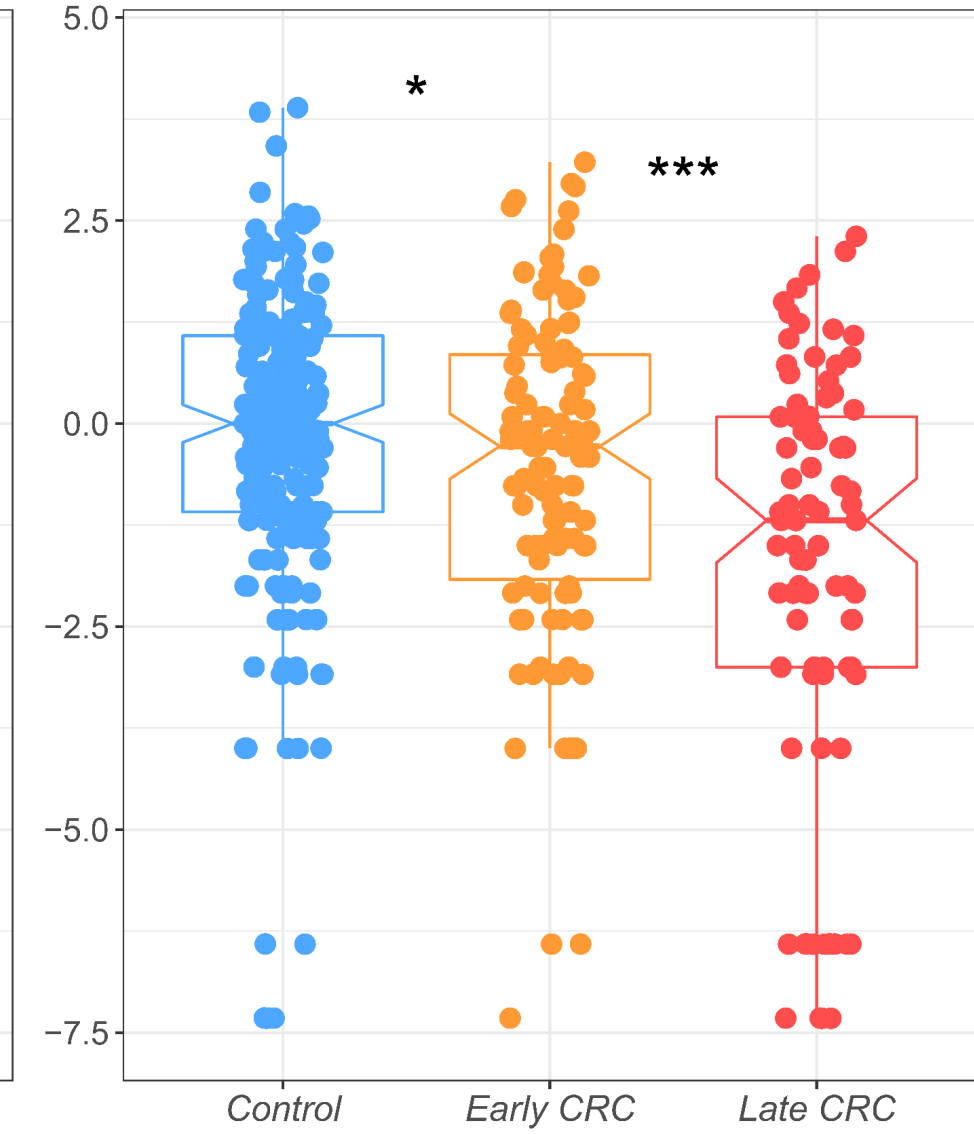

Control  
Early CRC  
Late CRC
