# Supplementary material for: Multi-cohort analysis of colorectal cancer metagenome identified altered bacteria across populations and universal bacterial markers
Source: PubMed Central journal article supplement (PMC5896039; doi:10.1186/s40168-018-0451-2), 2018-04-11

**A**

| Species                                  | pfp (4 cohorts) | pfp (3 cohorts) |
|------------------------------------------|-----------------|-----------------|
| <i>Porphyromonas asaccharolytica</i>     | 0               | 0               |
| <i>Fusobacterium nucleatum</i>           | 0               | 0               |
| <i>Prevotella intermedia</i>             | 0               | 0               |
| <i>Bacteroides fragilis</i>              | 0               | 0.0025          |
| <i>Parvimonas micra</i>                  | 0               | 0.002           |
| <i>Thermanaerovibrio acidaminovorans</i> | 0.0029          | 0.0017          |
| <i>Alistipes finegoldii</i>              | 0.0038          | 0.0233          |

**B**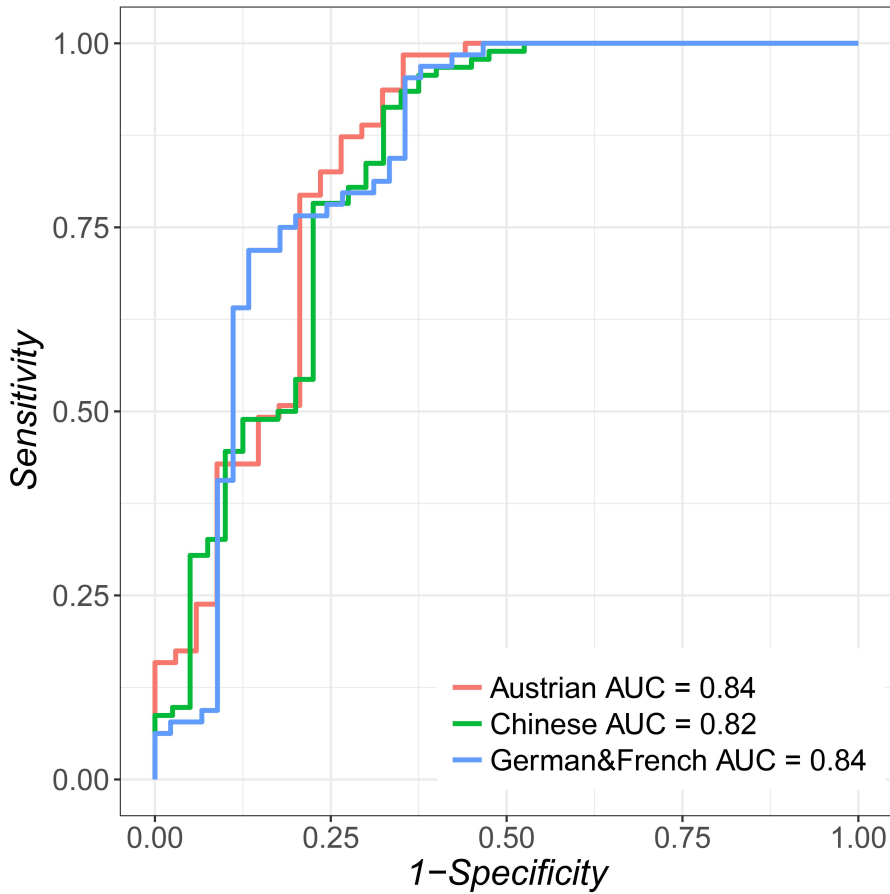

Supplement: 40168_2018_451_MOESM12_ESM.pdf [file 40168_2018_451_MOESM12_ESM.pdf]
