# Supplementary material for: Multi-cohort analysis of colorectal cancer metagenome identified altered bacteria across populations and universal bacterial markers
Source: PubMed Central journal article supplement (PMC5896039; doi:10.1186/s40168-018-0451-2), 2018-04-11

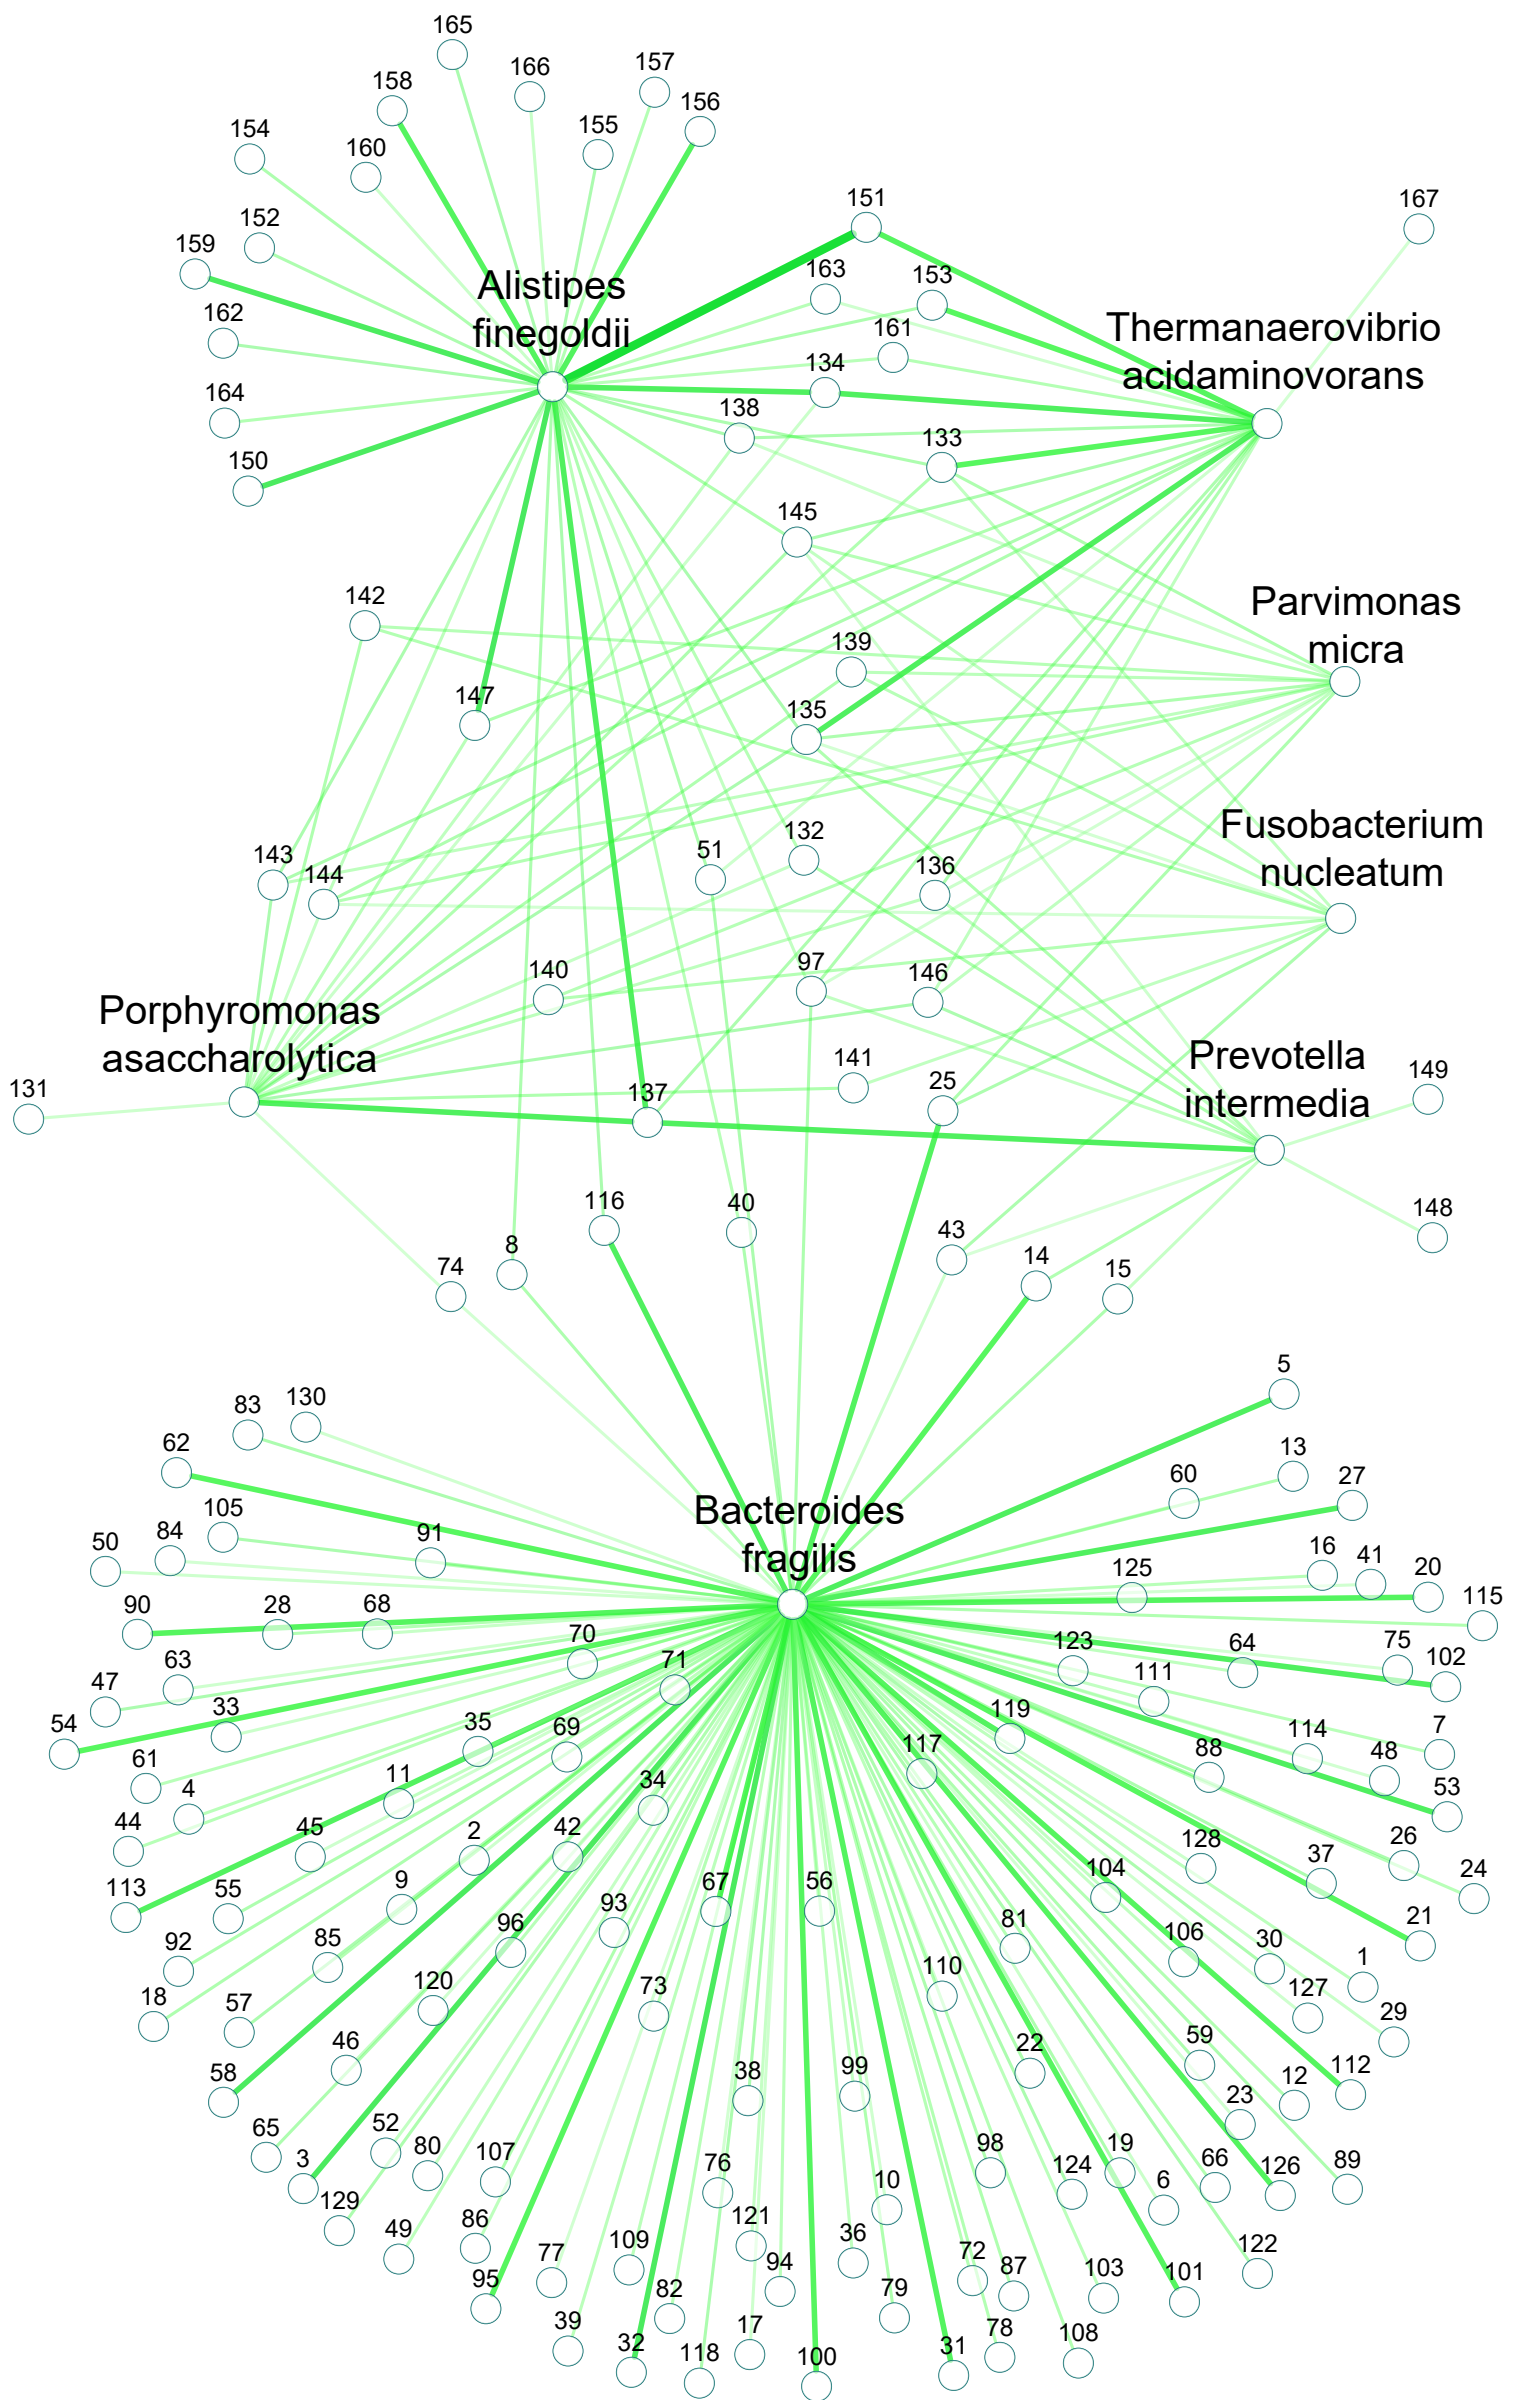

Supplement: 40168_2018_451_MOESM21_ESM.pdf [file 40168_2018_451_MOESM21_ESM.pdf]
